# Supplementary material
Source: PubMed Central journal article supplement (PMC3443687)
Supplement: NIHMS402434-supplement-Supplemental.pdf [file NIHMS402434-supplement-Supplemental.pdf]

## Supplemental Data

### Assay solution recipes and storage conditions:

#### Quadruplex Buffer (0.2 M sodium phosphate + 0.10 M citrate, pH 4.4):

6.9 g sodium phosphate monobasic monohydrate  
7.35 g sodium citrate tribasic dihydrate  
Dissolve in ~200 mL deionized water  
Adjust pH to 4.40 ( $\pm$  0.05) using 6N HCL  
Fill to 250 mL with deionized water  
Store @ 2-8°C for up to 6 months

#### ASM Buffer (0.840 M sodium acetate + 0.604 mM zinc chloride, pH 5.7):

17.14 g sodium acetate  
Dissolve in ~200 mL deionized water  
1.34 mL glacial acetic acid  
1.51 mL 0.1 mol/L zinc chloride  
Adjust pH to 5.7 using sodium hydroxide solution  
Fill to 250 mL with deionized water  
Store @ 2-8°C for up to 6 months

#### GAA Inhibitor (0.8 mM acarbose in water):

12.9 mg acarbose  
Dissolve in ~20 mL  
Fill to 25 mL with deionized water  
Prepare on day of use, shelf life has not yet been determined.

#### Detergent (96 g/L sodium taurocholate in water):

9.6 g sodium taurocholate  
Dissolve in 100 mL deionized water  
Store @  $\leq$  -20°C for up to 1 year

#### Quadruplex Solution (ABG, GAA, GALC, GLA):

Using 1 vial each of ABG, GAA, GALC and GLA S/S  
Transfer contents of ABG, and GAA vials into GALC vial using MeOH  
Remove MeOH by evaporation  
Transfer contents of GLA vial into GALC/ABG/GAA vial using 1.8 mL detergent  
Vortex until solids are completely dissolved. Heat in water bath if necessary.  
Add 0.3 mL GAA inhibitor  
Add 15.9 mL Quadruplex Buffer  
Vortex to homogenize.  
Store @  $\leq$  -20°C for up to 1 month

#### ASM Solution:

Using 1 vial of ASM S/S  
Add 0.15 mL detergent  
Add 17.85 mL ASM Buffer  
Vortex to homogenize  
Store @  $\leq$  -20°C for up to 1 month

Quadruplex and ASM buffer were stored in glass Wheaton bottles.

Detergent and final assay solutions were stored in polypropylene screw cap tubes.

### List of Reagents and Materials:

Sodium Phosphate Monobasic Monohydrate (Sigma-Aldrich #S9638, USA)  
Sodium Citrate Tribasic Dihydrate (Sigma-Aldrich #S4641, USA)  
Hydrochloric Acid (Mallinckrodt Chemicals #H613-45, NJ, USA)  
Sodium Acetate (Sigma-Aldrich #241245, USA)  
Zinc Chloride (Sigma #39059, USA)  
Sodium Hydroxide (Krackeler Scientific #11-3722-04, NY, USA)  
Taurocholic Acid Sodium Salt Hydrate (Sigma #T4009, USA)  
Acarbose (Toronto Research Chemicals # A123500, Canada)  
Methanol (JT Baker, NJ, USA)  
Ethyl Acetate (JT Baker, NJ, USA)  
Water (Barnstead Filtration System, Nanopure Diamond Filter # OC-ZL502X366, Iowa, USA)  
Silica Gel (Sigma-Aldrich #227196, 230-400 mesh, 60A, Merck, Grade 9385, USA)  
Ammonium Formate (Sigma-Aldrich #516961, USA)

Wallac DBS puncher (Perkin Elmer, MA, USA)  
V-Bottom Plates (Costar V-Bottom #3363, NY, USA)  
Plate Storage Mats (Costar, NY, USA)  
Centrifuge (Eppendorf, Centrifuge 5810)  
Plate Shaker (Barnstead Titer Plate Shaker #4625, Iowa, USA)  
Deep-well Plates (Costar, Square V-Bottom #3961, NY, USA)  
Filter Plates (E & K Scientific #2202, CA, USA)  
Plate Dryer (Caliper Life Sciences, MA, USA)  
Flat-Bottom Plates (Costar, Flat Bottom #3364, NY, USA)  
Tip Boxes (Axygen, 250  $\mu$ L pre-sterilized tips, #FX-250-LRS, CA, USA)  
Aluminum Foil (Krackeler Scientific #L610282, NY, USA)  
12 Channel Pipette (Biohit Proline 25-250  $\mu$ L)  
Biomek<sup>®</sup> NX Laboratory Workstation (Beckman Coulter, USA)  
Cytomat Hotel (Kendro, Germany)

## ESI-MS/MS instrument settings:

| Analyte | MRM Transition          | Cone Voltage (V) | Collision Energy (eV) |
|---------|-------------------------|------------------|-----------------------|
| GALC-IS | m/z 454.30 → m/z 264.25 | 15               | 20                    |
| GALC-P  | m/z 426.30 → m/z 264.25 | 15               | 20                    |
| GALC-S  | m/z 588.40 → m/z 264.25 | 15               | 20                    |
| GAA-IS  | m/z 503.25 → m/z 403.28 | 15               | 20                    |
| GAA-P   | m/z 498.25 → m/z 398.25 | 15               | 20                    |
| GAA-S   | m/z 660.30 → m/z 560.25 | 15               | 20                    |
| GLA-IS  | m/z 489.25 → m/z 389.25 | 25               | 20                    |
| GLA-P   | m/z 484.15 → m/z 384.25 | 25               | 20                    |
| GLA-S   | m/z 646.25 → m/z 546.25 | 25               | 20                    |
| ABG-IS  | m/z 510.45 → m/z 264.28 | 15               | 20                    |
| ABG-P   | m/z 482.40 → m/z 264.28 | 15               | 20                    |
| ABG-S   | m/z 644.45 → m/z 264.28 | 15               | 20                    |
| ASM-IS  | m/z 370.25 → m/z 264.25 | 15               | 20                    |
| ASM-P   | m/z 398.25 → m/z 264.25 | 15               | 20                    |
| ASM-S   | m/z 561.70 → m/z 398.30 | 15               | 20                    |

Transitions were conducted with a dwell time of 0.15 s and delay of 0.03 s.

|                                |             |
|--------------------------------|-------------|
| Capillary voltage (V)          | 3000        |
| Cone (V)                       | 15 (25 GLA) |
| Extractor (V)                  | 2           |
| RF Lens (V)                    | 0.1         |
| Source Temperature (°C)        | 90          |
| Desolvation Temperature (°C)   | 150         |
| Cone Gas Flow (L/hr)           | 600         |
| Desolvation Gas Flow (L/hr)    | 45          |
| LM 1 Resolution                | 15          |
| HM 1 Resolution                | 15          |
| Ion Energy 1                   | 0.2         |
| MSMS mode Entrance             | 2           |
| Collision                      | 20          |
| MSMS mode Exit                 | 1           |
| LM 2 Resolution                | 14          |
| HM 2 Resolution                | 14          |
| Ion Energy 2                   | 1           |
| Multiplier (V)                 | 750         |
| Collision Cell Pressure (mbar) | 6.98 e-4    |
| Collision Gas                  | Argon       |

A Waters Micromass® Quattro *micro*<sup>TM</sup> API tandem mass spectrometer was used in positive ion mode and data was acquired and analyzed using MassLynx 4.0 software. Above are the settings used for data acquisition on the MS/MS.

| Step               | Zhang, et al., 2008 method | Modified & Automated Method | 4plex + 1 Method |
|--------------------|----------------------------|-----------------------------|------------------|
| Punch              | 2 V-bottoms                | 2 V-bottoms                 | 2 V-bottoms      |
| Extract            | 4 V-bottoms                | 4 V-bottoms                 | n/a              |
|                    | 70 µL extract buffer       | 70 µL extract buffer        | n/a              |
| Add Assay Solution | 5 Solutions                | 5 Solutions                 | 2 Solutions      |
| Incubate           | 20 - 24 hr                 | 19 hr                       | 19 hr            |
| Quench             | 100 µL/plate               | 100 µL/plate                | 100 µL/plate     |
| Combine            | 1 deepwell                 | 1 deepwell                  | 1 deepwell       |
| Liq/Liq            | 400 µL / 400 µL            | 400 µL / 400 µL             | 400 µL / 400 µL  |
| Remove Organic     | 300 µL                     | 200 µL                      | 150 µL           |
| Dry                | -                          | -                           | -                |
| Reconstitute       | 300 µL                     | 200 µL                      | 150 µL           |
| SPE                | 1600 µL                    | 800 µL                      | 200 µL           |
| Dry                | -                          | -                           | -                |
| Recon/transfer     | 200 µL                     | 100 µL                      | 100 µL           |

**Table 1.** Summary of modifications to the previously published assay by Zhang et al., 2008.

| Analyte     | CDC Mean Activity (95% Confidence Limits). |                  |                      |
|-------------|--------------------------------------------|------------------|----------------------|
|             | Low QC                                     | Med QC           | High QC              |
| <b>GALC</b> | 0.25 (0.12-0.38)                           | 1.59 (1.11-2.08) | 3.47 (3.14 - 3.80)   |
| <b>GAA</b>  | 1.13 (0.90-1.37)                           | 7.67 (6.29-9.05) | 15.76 (12.13-19.40)  |
| <b>GLA</b>  | 0.56 (0.31-0.80)                           | 3.87 (3.11-4.64) | 8.31 (6.90 - 9.72)   |
| <b>ABG</b>  | 0.99 (0.52-1.46)                           | 5.83 (4.42-7.23) | 12.59 (10.37-14.81)  |
| <b>ASM</b>  | 0.28 (0.00-0.60)                           | 1.30 (0.92-1.67) | 2.54 (2.02 - 3.07)   |
| <b>IDUA</b> | 0.45 (0.00-1.05)                           | 5.31 (3.84-6.79) | 11.46 ( 9.15 -13.76) |

**Table 2:** LSD QC analytical information as received from the Centers for Disease Control and Prevention. Values were obtained using the previously published MS/MS method by Zhang, et al. 2008 [6 and 14]. Units are expressed as  $\mu\text{mol/L/hr}$ .

| Blank   | Uncorrected Blank Activity ( $\mu\text{mol/L/hr}$ ) |       |       |       |       |
|---------|-----------------------------------------------------|-------|-------|-------|-------|
|         | GALC                                                | GAA   | GLA   | ABG   | ASM   |
| Average | 0.03                                                | 0.06  | 0.12  | 0.13  | 0.10  |
| Std Dev | 0.01                                                | 0.06  | 0.07  | 0.05  | 0.05  |
| CV      | 34.61                                               | 88.43 | 59.70 | 37.40 | 47.00 |
| N       | 174                                                 | 174   | 174   | 174   | 174   |
| Min     | 0.00                                                | 0.03  | 0.06  | 0.06  | 0.03  |
| Max     | 0.09                                                | 0.65  | 0.87  | 0.5   | 0.43  |

Table 3A

| Med CDC | Activity (CDC Certified Value) |             |             |             |             |
|---------|--------------------------------|-------------|-------------|-------------|-------------|
|         | GALC                           | GAA         | GLA         | ABG         | ASM         |
| Average | 1.31 (1.59)                    | 6.29 (7.67) | 9.53 (3.87) | 3.90 (5.83) | 4.32 (1.30) |
| Std Dev | 0.27                           | 0.98        | 1.11        | 1.22        | 0.87        |
| CV      | 20.68                          | 15.56       | 11.67       | 31.40       | 20.04       |
| N       | 118                            | 118         | 118         | 118         | 118         |
| Min     | 0.90                           | 3.83        | 7.72        | 1.31        | 2.24        |
| Max     | 2.28                           | 8.83        | 12.48       | 7.11        | 7.54        |

Table 3C

| Low CDC | Activity (CDC Certified Value) |             |             |             |             |
|---------|--------------------------------|-------------|-------------|-------------|-------------|
|         | GALC                           | GAA         | GLA         | ABG         | ASM         |
| Average | 0.21 (0.25)                    | 1.13 (1.13) | 1.51 (0.56) | 0.92 (0.99) | 0.74 (0.28) |
| Std Dev | 0.09                           | 0.17        | 0.19        | 0.23        | 0.38        |
| CV      | 42.71                          | 15.22       | 12.48       | 25.11       | 51.40       |
| N       | 118                            | 118         | 118         | 118         | 118         |
| Min     | 0.09                           | 0.72        | 1.22        | 0.5         | 0.44        |
| Max     | 1.01                           | 2.07        | 2.63        | 1.68        | 4.16        |

Table 3B

| High CDC | Activity (CDC Certified Value) |               |              |              |             |
|----------|--------------------------------|---------------|--------------|--------------|-------------|
|          | GALC                           | GAA           | GLA          | ABG          | ASM         |
| Average  | 2.30 (3.47)                    | 12.22 (15.76) | 18.81 (8.31) | 7.46 (12.59) | 8.94 (2.54) |
| Std Dev  | 0.25                           | 1.26          | 1.73         | 1.71         | 1.51        |
| CV       | 10.77                          | 10.34         | 9.19         | 22.98        | 16.92       |
| N        | 118                            | 118           | 118          | 118          | 118         |
| Min      | 1.70                           | 8.92          | 15.07        | 3.97         | 5.42        |
| Max      | 3.16                           | 16.42         | 23.16        | 12.02        | 13.23       |

Table 3D

**Tables 3A-3D:** A summary of QC results broken down by specimen type. Note that in Table 3A values show uncorrected (not blank subtracted) activity ( $\mu\text{mol/L/hr}$ ) while in Tables 3B-D values are expressed as blank subtracted activities. CDC certified values were incorporated from Table 3 for ease of comparison.

**DBS extraction/distribution experiment details:** One plate of specimens consisting of 87 de-identified newborns and three of each control specimen (blanks, low, high LSD QC) was punched in triplicate. One plate (Plate 3, Table 4 of publication) had DBS extract distributed to individual assay plates in alphabetical order (ABG, GAA, GLA) while the other two plates (Plates 1 and 2, Table 4) used reverse alphabetical order (GLA, GAA, ABG) to distribute extract. Sample processing then proceeded in accordance with our modified version of the previously published method from Zhang and coworkers.
